# Supplementary material for: Alzheimer risk gene product Pyk2 suppresses tau phosphorylation and phenotypic effects of tauopathy
Source: Mol Neurodegener. 2022 May 3;17:32. doi: 10.1186/s13024-022-00526-y (PMC9063299; doi:10.1186/s13024-022-00526-y)
Supplement: Supplementary file 1 — Additional file 1. [file 13024_2022_526_MOESM1_ESM.pdf]

## ADDITIONAL INFORMATION.

Supplemental Figures 1-7 and Supplemental Table 1.

**A**

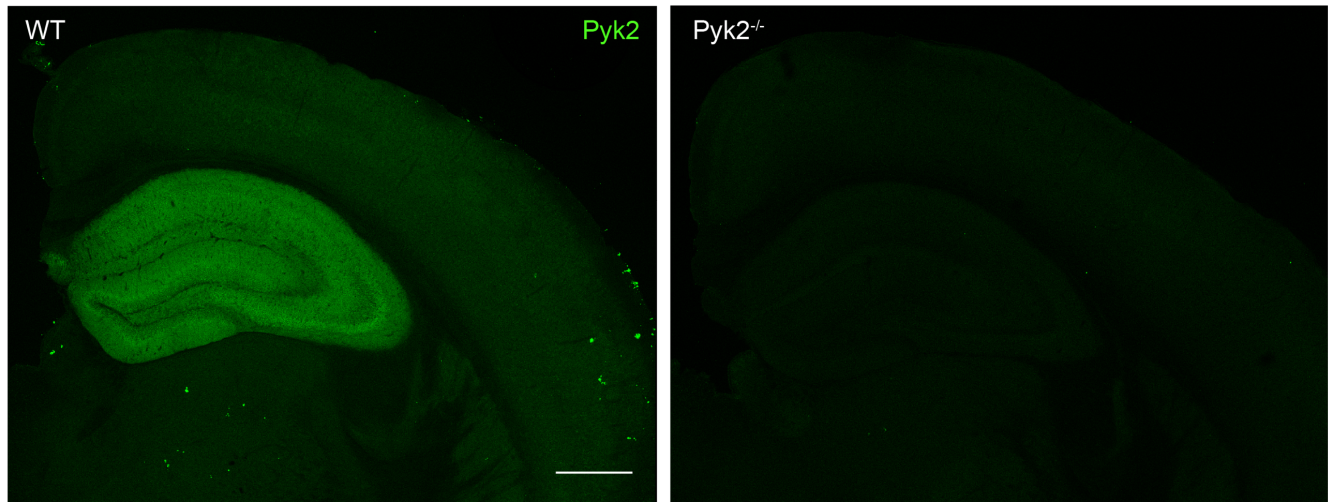

**B**

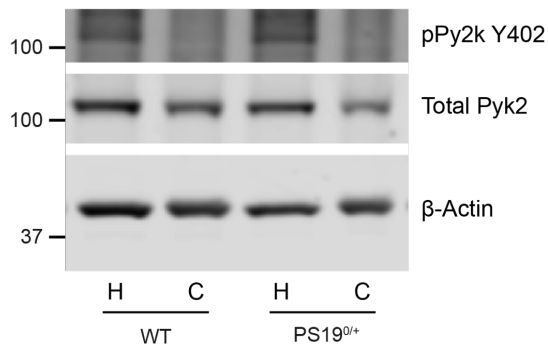

**C**

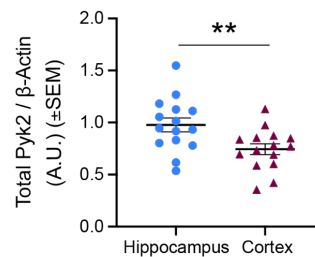

**D**

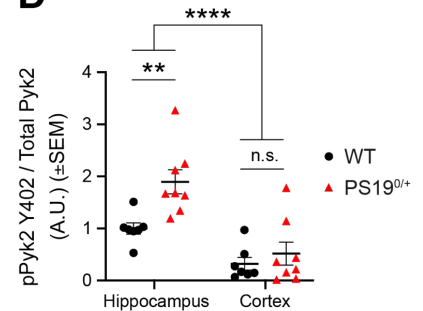

**Supplemental Figure 1.** Pyk2 expression is predominantly enriched in hippocampus compared to cortex, while PS19-driven Pyk2 activity is confined to hippocampus. **A**, Tiled, immunofluorescent images of Pyk2 immunoreactivity in hippocampus, cortex and thalamus of 9.5–10.5-month-old WT and Pyk2<sup>-/-</sup> mice. Scale bar, 500  $\mu$ m. **B**, Representative immunoblot images of TBS-insoluble, SDS-soluble Pyk2 from hippocampus and cortex of 9.5–10.5-month WT and PS19<sup>0/+</sup> animals. **C** and **D**, Quantification of **B**. **C**, Pyk2 expression is significantly reduced in cortex compared to hippocampus of WT and PS19<sup>0/+</sup> mice. Data are graphed as mean  $\pm$  SEM, unpaired two-tailed *t*-test, \*\**p*<0.01, *n* = 15 mice. **D**, Overall Pyk2 activation (pPyk2 Y402 normalized to total Pyk2) is significantly reduced in cortex compared to hippocampus of WT and PS19<sup>0/+</sup> mice, while significant tau-induced Pyk2 activation (pPyk2 Y402 normalized to total Pyk2) in PS19<sup>0/+</sup> compared to WT mice is restricted to hippocampus. Data are graphed as mean  $\pm$  SEM, two-way ANOVA, \*\**p*<0.01; unpaired two-tailed *t*-test, \*\**p*<0.01, n.s. = not significant (*p* = 0.4657), *n* = 7–8 mice.

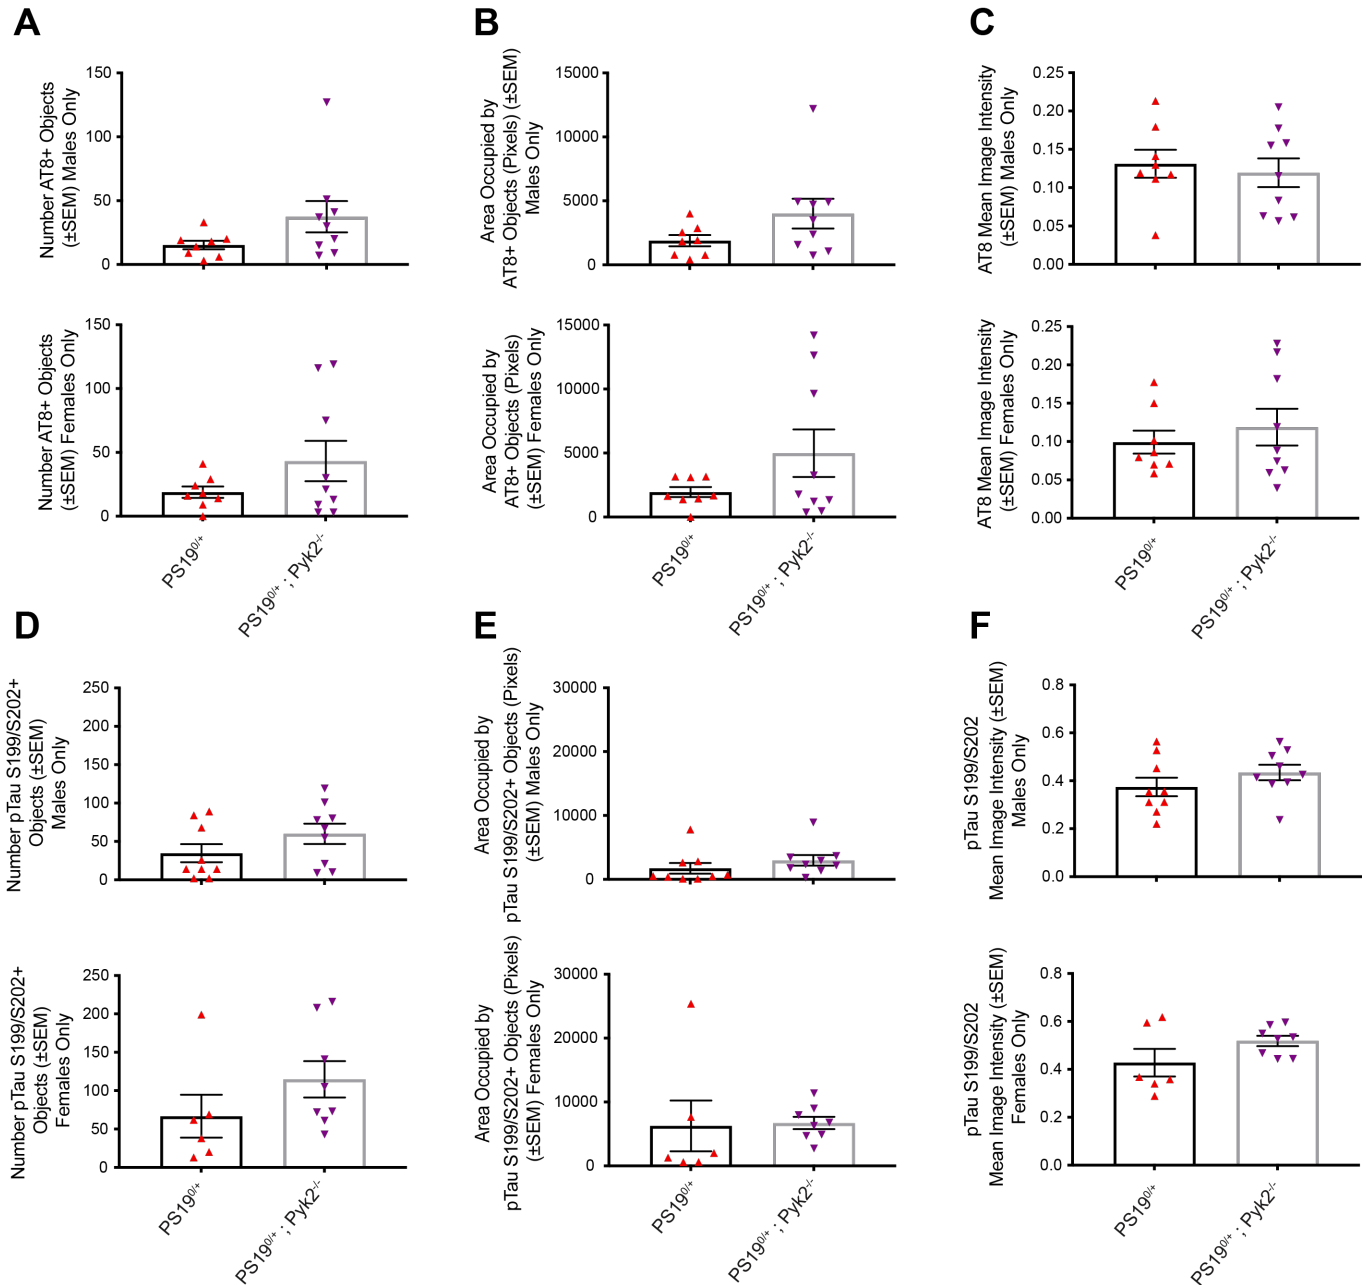

**Supplemental Figure 2.** Augmented Tau pathology in amygdala of PS19<sup>0/+</sup>;Pyk2<sup>-/-</sup> compared to PS19<sup>0/+</sup> mice is driven neither by males nor females alone. **A–C**, Quantification of amygdalar AT8 immunoreactivity in 9.5–10.5-month-old PS19<sup>0/+</sup> and PS19<sup>0/+</sup>;Pyk2<sup>-/-</sup> animals segregated by sex. No significant differences in the number of AT8-positive cell bodies (objects) (**A**), the area occupied by AT8-positive cell bodies (**B**) or AT8 mean image intensity (**C**) in either male or female PS19<sup>0/+</sup> and PS19<sup>0/+</sup>;Pyk2<sup>-/-</sup> animals when segregated by sex. Data are graphed as mean ± SEM, unpaired two-tailed *t*-test, *n* = 8–9 mice. **D–F**, Quantification of amygdalar pTau S199/S202 immunoreactivity in 9.5–10.5-month-old PS19<sup>0/+</sup> and PS19<sup>0/+</sup>;Pyk2<sup>-/-</sup> animals segregated by sex. No significant differences in number of pTau S199/S202-positive cell bodies (objects) (**D**), area occupied by pTau S199/S202-positive cell bodies (**E**) or pTau S199/S202 mean image intensity (**F**) in male or female PS19<sup>0/+</sup> and PS19<sup>0/+</sup>;Pyk2<sup>-/-</sup> animals when segregated by sex. Data are graphed as mean ± SEM, unpaired two-tailed *t*-test, *n* = 6–9 mice.

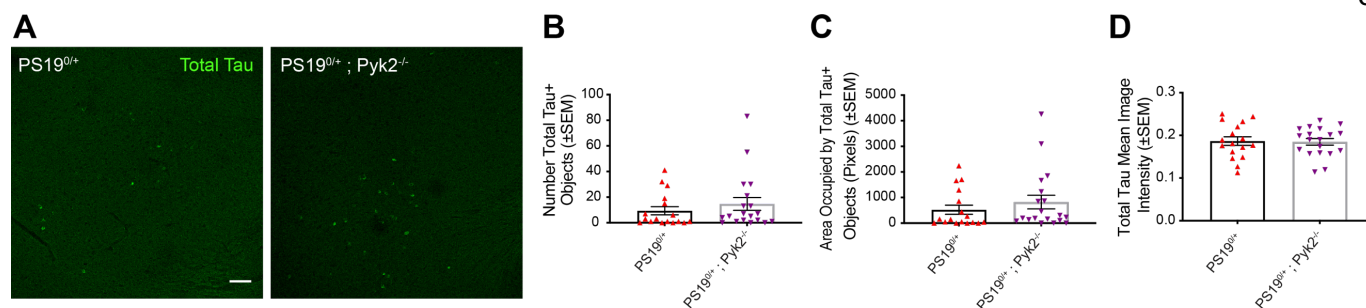

**Supplemental Figure 3.** Pyk2 deletion fails to result in detectable changes in total Tau immunofluorescence histologically. **A**, Representative immunofluorescent images of total Tau immunoreactivity in amygdala of 9.5–10.5-month-old WT, Pyk2<sup>-/-</sup>, PS19<sup>0/+</sup> and PS19<sup>0/+</sup>;Pyk2<sup>-/-</sup> animals. Scale bar, 100 μm. **B–D**, Quantification of **A**. Quantification of amygdalar total Tau immunoreactivity reveals no significant changes in the number of total Tau-positive cell bodies (objects) (**B**), the area occupied by those objects (**C**) or in mean image intensity (**D**) between PS19<sup>0/+</sup> and PS19<sup>0/+</sup>;Pyk2<sup>-/-</sup> animals. Data are graphed as mean ± SEM, unpaired two-tailed *t*-test, *n* = 17–19 mice.

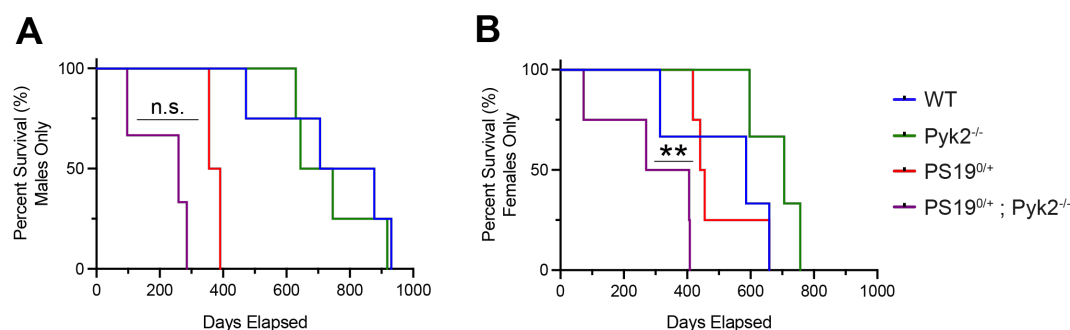

**Supplemental Figure 4.** Reduced survivorship in PS19<sup>0/+</sup>;Pyk2<sup>-/-</sup> compared to PS19<sup>0/+</sup> mice is primarily driven by female animals. **A** and **B**, Kaplan-Meier survival curves of WT, Pyk2<sup>-/-</sup>, PS19<sup>0/+</sup> and PS19<sup>0/+</sup>;Pyk2<sup>-/-</sup> animals segregated by sex. Survivorship of male PS19<sup>0/+</sup>;Pyk2<sup>-/-</sup> mice (median survival, 259 days) is not significantly reduced compared to male PS19<sup>0/+</sup> animals (median survival, 373 days). Log-rank (Mantel-Cox) test, n.s. = not significant (*p* = 0.0634), *n* = 2–3 mice (**A**). Survivorship of female PS19<sup>0/+</sup>;Pyk2<sup>-/-</sup> mice (median survival, 338 days) is significantly less than that of female PS19<sup>0/+</sup> animals (median survival, 448 days). Log-rank (Mantel-Cox) test, \*\**p* = 0.0067, *n* = 4 mice (**B**).

**A**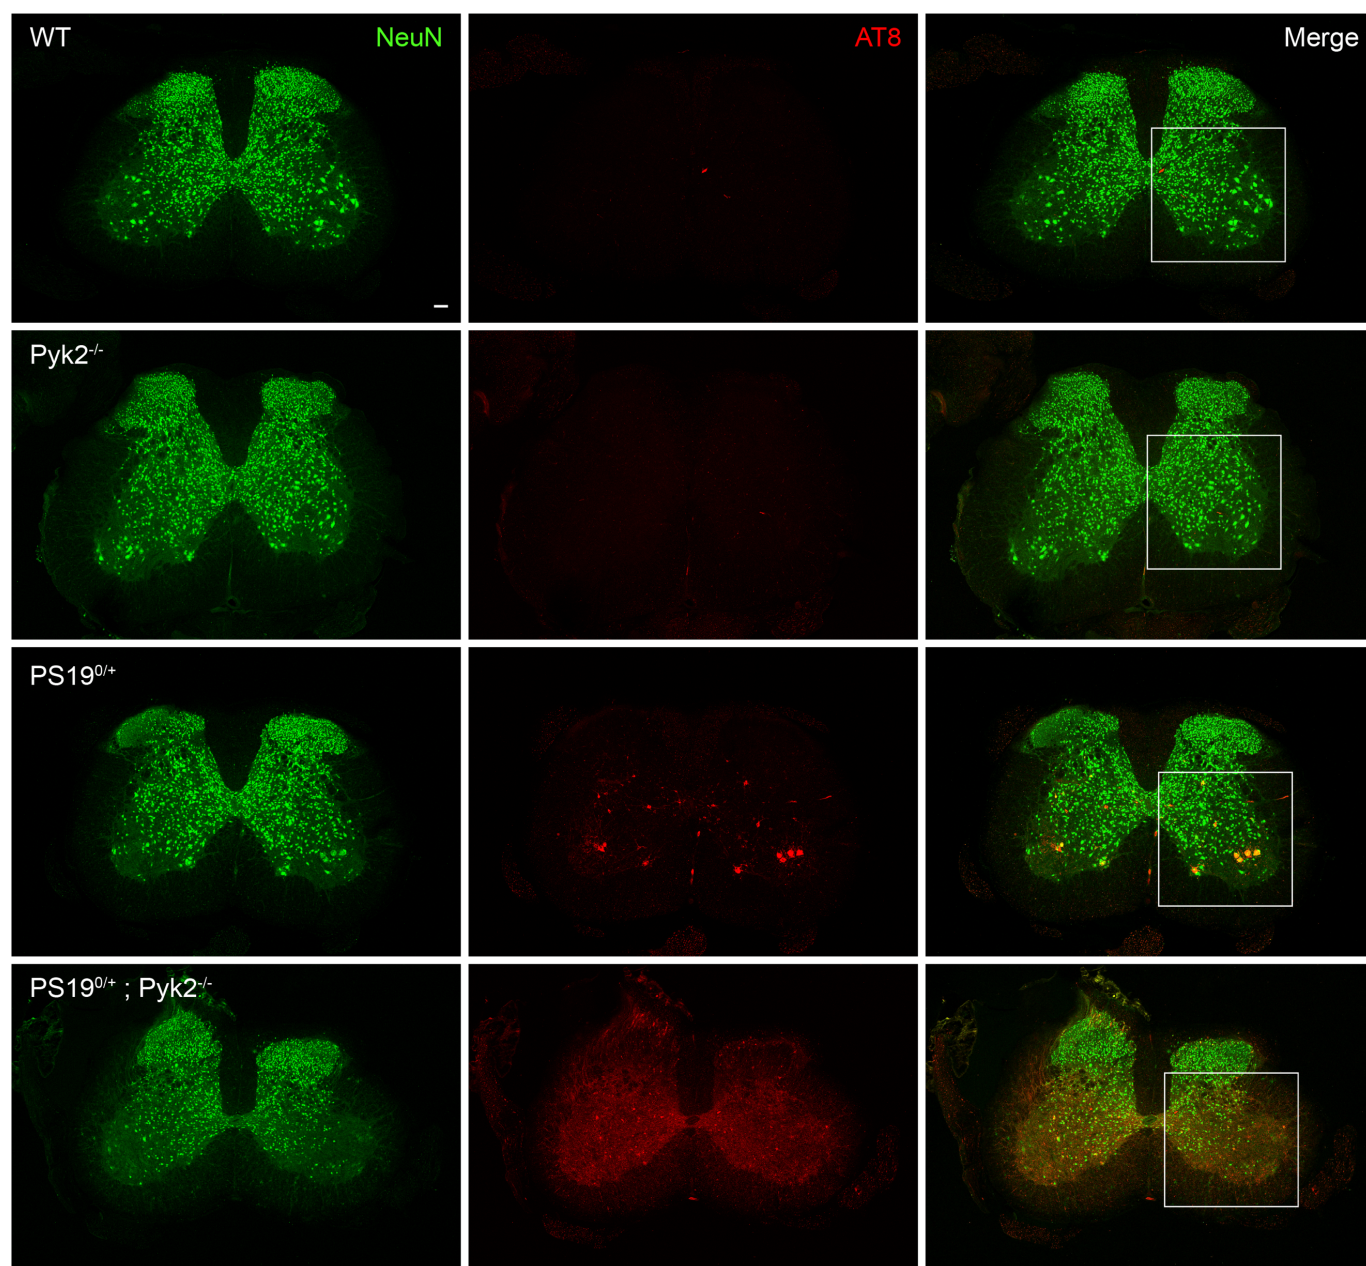**B**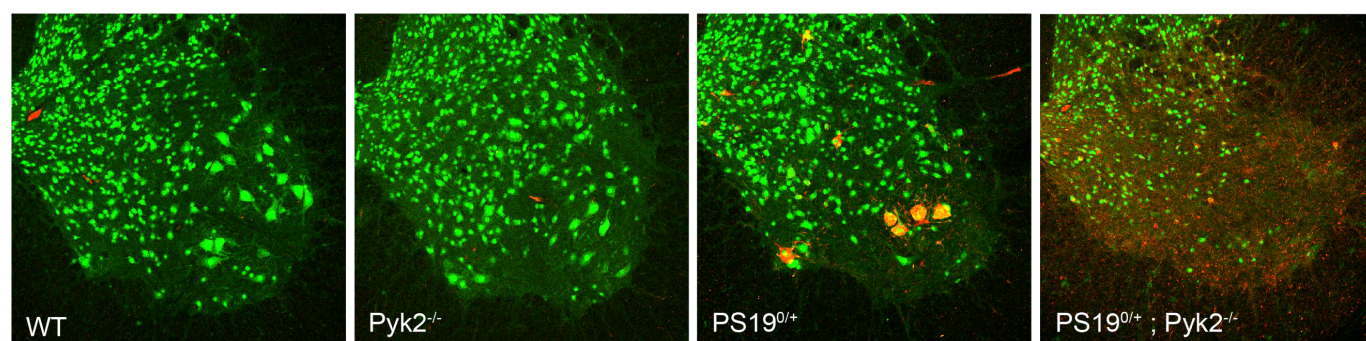

**Supplemental Figure 5.** PS19-driven Tau pathology is present in spinal cord lumbar enlargement of *PS19*<sup>0/+</sup> and *PS19*<sup>0/+</sup>; *Pyk2*<sup>-/-</sup> animals. **A** and **B**, Immunofluorescent images of lumbar spinal cord from 9.5–10.5-month-old WT, *Pyk2*<sup>-/-</sup>, *PS19*<sup>0/+</sup> and *PS19*<sup>0/+</sup>; *Pyk2*<sup>-/-</sup> animals labeled with NeuN (green) and pTau S202/T205 (AT8) (red). Scale bar, 100  $\mu$ m. **B**, Enlargement of ventral horn shown in **A** (white box)

demonstrating colocalization of NeuN and AT8 immunofluorescence in PS19<sup>0/+</sup> spinal cord and loss of NeuN-positive neuronal cell bodies in PS19<sup>0/+</sup>;Pyk2<sup>-/-</sup> spinal cord.

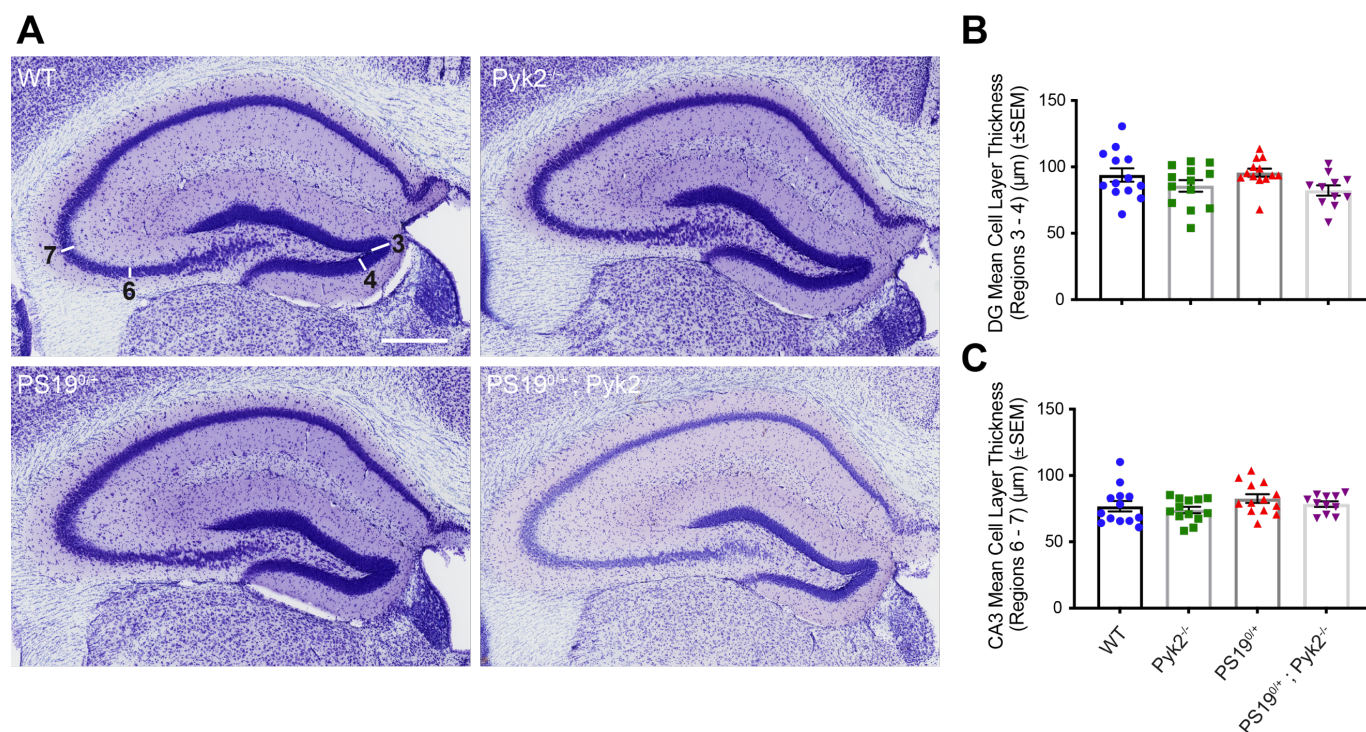

**Supplemental Figure 6.** No evidence of Tau-induced hippocampal neurodegeneration in PS19<sup>0/+</sup> or PS19<sup>0/+</sup>;Pyk2<sup>-/-</sup> animals. **A**, Representative images of cresyl violet-stained sections from 9.5–10.5-month-old WT, Pyk2<sup>-/-</sup>, PS19<sup>0/+</sup> and PS19<sup>0/+</sup>;Pyk2<sup>-/-</sup> animals. Scale bar, 400 μm. **B** and **C**, Quantification of hippocampal cell layer thickness in the dentate gyrus (regions 3 and 4) and CA3 (regions 6 and 7) labeled in **A**. There were no significant differences in mean cell layer thickness of the dentate gyrus (**B**) or CA3 (**C**) across genotypes. Data are graphed as mean ± SEM, one-way ANOVA with Tukey's multiple comparisons test,  $n = 11$ – $13$  mice.

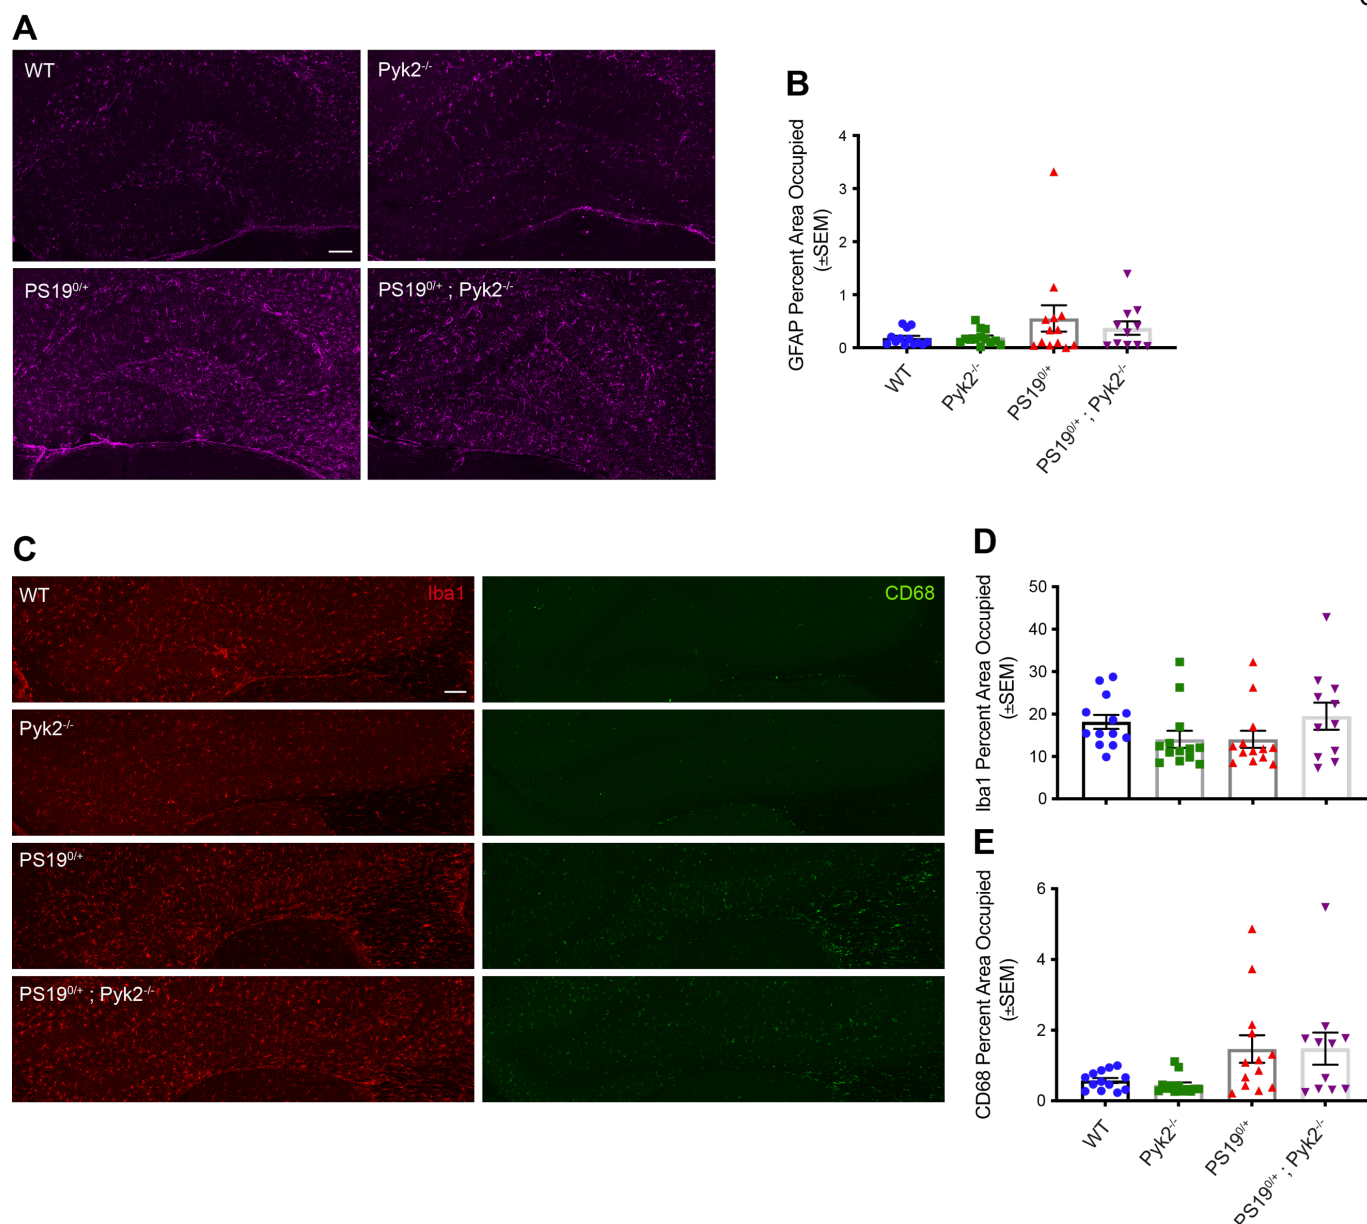

**Supplemental Figure 7.** Pyk2 deletion fails to result in detectable modulation of Tau-induced gliosis. **A**, Representative tiled, immunofluorescent images of GFAP immunoreactivity in dentate gyrus of 9.5–10.5-month-old WT, Pyk2<sup>-/-</sup>, PS19<sup>0/+</sup> and PS19<sup>0/+</sup>;Pyk2<sup>-/-</sup> animals. Scale bar, 100  $\mu$ m. **B**, Quantification of **A**. There were no significant differences in astrogliosis (GFAP percent area occupied) across genotypes (**B**). Data are graphed as mean  $\pm$  SEM, one-way ANOVA with Tukey's multiple comparisons test,  $n = 11$ –13 mice. **C**, Representative tiled, immunofluorescent images of Iba1 (red) and CD68 (green) immunoreactivity in hippocampus of 9.5–10.5-month-old WT, Pyk2<sup>-/-</sup>, PS19<sup>0/+</sup> and PS19<sup>0/+</sup>;Pyk2<sup>-/-</sup> animals. Scale bar, 100  $\mu$ m. **D** and **E**, Quantification of **C**. There were no significant differences in total hippocampal microglia (Iba1 percent area occupied) (**D**) nor activated hippocampal microglia (CD68 percent area occupied) (**E**) across genotypes. Data are graphed as mean  $\pm$  SEM, one-way ANOVA with Tukey's multiple comparisons test,  $n = 11$ –13 mice.

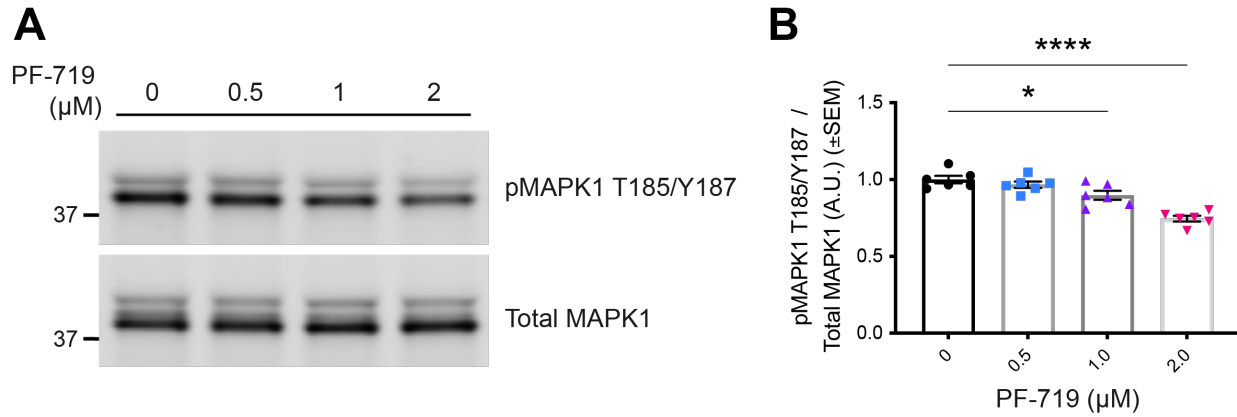

**Supplemental Figure 8.** Pyk2 activates MAPK1. **A** and **B**, Pyk2 was pharmacologically inhibited in iPSC-derived human cortical neurons (90–100 days post terminal differentiation) (same as shown in Figure 2e–i) using PF-719 at the concentrations indicated. **A**, Representative immunoblot images of lysates from PF-719-treated iPSC-derived human cortical neurons. **B**, Quantification of **A**. Pyk2 inhibition significantly decreased MAPK1 activity (pMAPK1 T185/Y187 normalized to total MAPK1) at 1.0 and 2.0  $\mu\text{M}$  PF-719 (**B**). Data are graphed as mean  $\pm$  SEM, one-way ANOVA with Dunnett's multiple comparisons test, \* $p < 0.05$ , \*\*\*\* $p < 0.0001$ ,  $n = 6$ .

**Supplemental Table 1.** Kyoto Encyclopedia of Genes and Genomes (KEGG) enrichment for total protein hits across proteomic analyses. Only one node, “pathways of neurodegeneration,” was identified from hits generated from the PS19<sup>0/+</sup> vs PS19<sup>0/+</sup>;Pyk2<sup>-/-</sup> analysis, while no pathways were identified for the WT vs Pyk2<sup>-/-</sup> analysis.

| Fraction      | Analysis                                                        | % Associated Genes | Associated Genes Found                                    | Number of Genes | Pathway Term                  | KEGG ID    | Term P-Value | Term P-Value Corrected with Bonferroni Step Down |
|---------------|-----------------------------------------------------------------|--------------------|-----------------------------------------------------------|-----------------|-------------------------------|------------|--------------|--------------------------------------------------|
| Total Protein | WT vs Pyk2 <sup>-/-</sup>                                       | NA                 | NA                                                        | NA              | NA                            | NA         | NA           | NA                                               |
|               | PS19 <sup>0/+</sup> vs PS19 <sup>0/+</sup> ;Pyk2 <sup>-/-</sup> | 1.89               | CSNK2B, CYTB, DLG4, FUS, MTOR, PLCB1, PLCB3, RYR1, UQCR10 | 9               | Pathways of neurodegeneration | KEGG:05022 | 0.187479957  | 0.187479957                                      |
